# Supplementary material for: Spatial variability and the fate of cesium in coastal sediments near Fukushima, Japan
Source: Copernicus journal article supplement (doi:10.5194/bg-11-5123-2014), 2014-09-23
Supplement: Supplementary file 1 [file bg-11-5123-2014-supplement.pdf]

Supplement of Biogeosciences, 11, 5123–5137, 2014  
<http://www.biogeosciences.net/11/5123/2014/>  
doi:10.5194/bg-11-5123-2014-supplement  
© Author(s) 2014. CC Attribution 3.0 License.

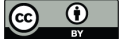

*Supplement of*

## **Spatial variability and the fate of cesium in coastal sediments near Fukushima, Japan**

**E. E. Black and K. O. Buesseler**

*Correspondence to:*

**Supplemental Materials:****Supplement S1** Additional Information for Sampling Locations of Marine Sediment Cores off the Coast of Fukushima, Japan

| Core No. | Date Sampled (m-dd-yy) | Latitude (N) | Longitude (E) | Water Depth (m) | Distance from FDNPP (km) | Core Length (cm) |
|----------|------------------------|--------------|---------------|-----------------|--------------------------|------------------|
| 1        | 6/29/12                | 30.2002      | 145.0990      | 5900            | 886                      | 10               |
| 2        | 6/12/12                | 47.0117      | 159.7217      | 5156            | 1863                     | 10               |
| 3        | 5/14/12                | 38.3144      | 143.6216      | 4066            | 248                      | 6                |
| 4        | 5/14/12                | 38.2664      | 143.5000      | 3259            | 236                      | 8                |
| 5        | 7/7/12                 | 36.4825      | 141.5020      | 1300            | 113                      | 10               |
| 6        | 5/22/13                | 36.5025      | 141.4952      | 1260            | 110                      | 18               |
| 7        | 5/15/12                | 37.5008      | 142.0020      | 546             | 86                       | 8                |
| 8        | 5/16/12                | 36.7678      | 141.4023      | 497             | 80                       | 8                |
| 9        | 5/16/12                | 37.0007      | 141.4990      | 321             | 62                       | 8                |
| 10       | 5/17/12                | 36.4995      | 140.9988      | 309             | 103                      | 8                |
| 11       | 5/19/13                | 36.9162      | 141.3439      | 205             | 63                       | 17               |
| 12       | 5/19/13                | 36.9173      | 141.0890      | 125             | 56                       | 20               |
| 13       | 5/21/13                | 37.2340      | 141.2300      | 125             | 27                       | 19               |
| 14       | 5/19/13                | 36.9143      | 141.0005      | 65              | 57                       | 16               |
| 15       | 5/16/13                | 37.4167      | 141.2985      | 120             | 23                       | 12               |
| 16       | 5/17/13                | 37.4165      | 141.1778      | 60              | 13                       | 14               |
| 17       | 5/16/13                | 37.5499      | 141.1262      | 35              | 16                       | 14               |
| 18       | 5/17/13                | 37.4161      | 141.0997      | 35              | 6                        | 14               |
| 19       | 9/11/13                | 37.5000      | 141.0792      | 23              | 9                        | 16               |
| 20       | 9/11/13                | 37.4167      | 141.0500      | 14              | 2                        | 18               |
| R1-R8    | 5/21/13                | 37.2340      | 141.2300      | 125             | 27                       | 5                |

**Supplement S2** Replicate Core Activities and Inventories from Core 13 Location

| No.             | Activities (Bq kg <sup>-1</sup> dry) |                                |                                 | Inventories (Bq m <sup>-2</sup> ) |                                |                                 |
|-----------------|--------------------------------------|--------------------------------|---------------------------------|-----------------------------------|--------------------------------|---------------------------------|
|                 | <sup>134</sup> Cs <sup>1</sup>       | <sup>137</sup> Cs <sup>1</sup> | <sup>210</sup> Pb <sub>ex</sub> | <sup>134</sup> Cs <sup>1</sup>    | <sup>137</sup> Cs <sup>1</sup> | <sup>210</sup> Pb <sub>ex</sub> |
| R1              | 49 ± 3                               | 55 ± 4                         | 140 ± 10                        | 2000 ± 100                        | 2200 ± 200                     | 5500 ± 400                      |
| R2              | 210 ± 10                             | 220 ± 20                       | 200 ± 20                        | 6000 ± 400                        | 6500 ± 500                     | 5900 ± 400                      |
| R3              | 48 ± 3                               | 56 ± 4                         | 150 ± 10                        | 1800 ± 100                        | 2200 ± 200                     | 5800 ± 400                      |
| R4              | 110 ± 10                             | 120 ± 10                       | 220 ± 20                        | 3300 ± 200                        | 3600 ± 300                     | 6500 ± 500                      |
| R5              | 62 ± 4                               | 63 ± 4                         | 210 ± 20                        | 2300 ± 200                        | 2400 ± 200                     | 7800 ± 600                      |
| R6              | 59 ± 4                               | 67 ± 5                         | 190 ± 10                        | 1900 ± 100                        | 2100 ± 100                     | 6100 ± 500                      |
| R7              | 55 ± 4                               | 64 ± 4                         | 220 ± 20                        | 1800 ± 100                        | 2100 ± 100                     | 7100 ± 500                      |
| R8              | 43 ± 3                               | 45 ± 3                         | 170 ± 10                        | 1500 ± 100                        | 1600 ± 100                     | 5800 ± 400                      |
| 13 <sup>2</sup> | 220 ± 6                              | 200 ± 10                       | 1000 ± 30                       | 9100 ± 300                        | 8000 ± 200                     | 6400 ± 200                      |

<sup>1</sup>Values were decay-corrected to FDNPP discharge maximum (April 6<sup>th</sup>, 2011)

<sup>2</sup>Results for 0 to 5 cm only

**Supplement S3** <sup>134</sup>Cs Inventories versus <sup>210</sup>Pb<sub>ex</sub> Inventories for Replicate Cores and Core 13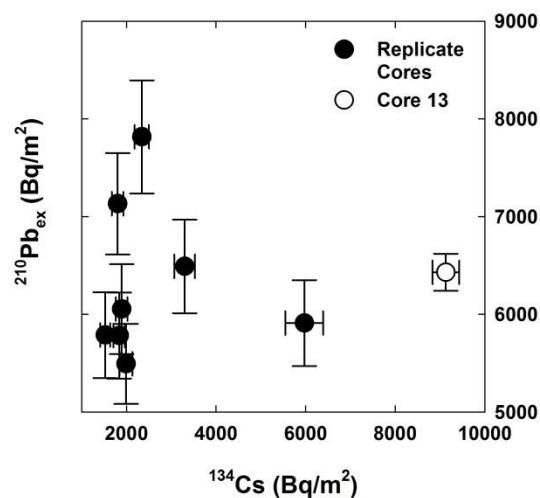

**Supplement S4** Replicate Core and Core 13 Grain Size Analysis Results

## Grain Size and Density Results

| No.             | D50<br>( $\mu\text{m}$ ) | % Clay<br>( $<4 \mu\text{m}$ ) | % Silt and<br>Clay<br>( $<63.4 \mu\text{m}$ ) | Dry Bulk<br>Density (g<br>$\text{cm}^{-3}$ ) |
|-----------------|--------------------------|--------------------------------|-----------------------------------------------|----------------------------------------------|
| R1              | 19                       | 12.0                           | 85.2                                          | 1.5                                          |
| R2              | 33                       | 7.6                            | 72.5                                          | 1.2                                          |
| R3              | 37                       | 8.7                            | 69.4                                          | 1.4                                          |
| R4              | 28                       | 9.0                            | 75.7                                          | 1.3                                          |
| R5              | 38                       | 8.4                            | 69.0                                          | 1.5                                          |
| R6              | 36                       | 7.3                            | 70.3                                          | 1.4                                          |
| R7              | 33                       | 8.2                            | 72.4                                          | 1.4                                          |
| R8              | 41                       | 8.2                            | 66.2                                          | 1.5                                          |
| 13 <sup>1</sup> | 40                       | 9                              | 68                                            | 1.5                                          |

<sup>1</sup>Results for 0 to 5 cm only

Supplement S5  $^{134}\text{Cs}$  and  $^{210}\text{Pb}_{\text{ex}}$  Activities versus Grain Size Parameters for Replicate Cores and Core 13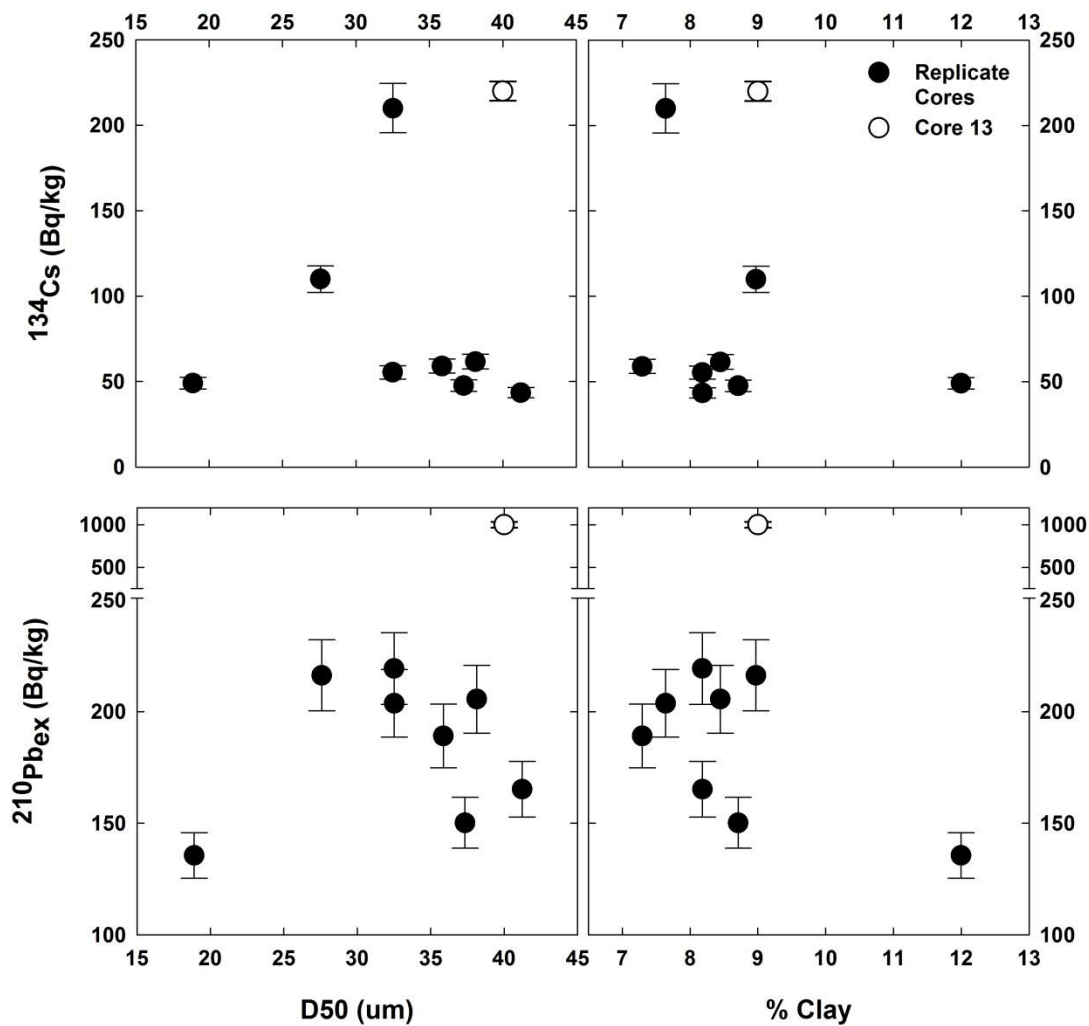

## Supplement S6 Density, Activity, and Inventory Values by Core Section

| Core No. | Depth (cm) | Thickness (m) | Bulk Density | Dry Density | $^{210}\text{Pb}_{\text{ex}}$ (Bq kg <sup>-1</sup> ) | $^{210}\text{Pb}_{\text{ex}}$ (Bq m <sup>-2</sup> ) | $^{137}\text{Cs}$ (Bq kg <sup>-1</sup> ) | $^{137}\text{Cs}$ (Bq/m <sup>-2</sup> ) | $^{134}\text{Cs}$ (Bq kg <sup>-1</sup> ) | $^{134}\text{Cs}$ (Bq/m <sup>-2</sup> ) |
|----------|------------|---------------|--------------|-------------|------------------------------------------------------|-----------------------------------------------------|------------------------------------------|-----------------------------------------|------------------------------------------|-----------------------------------------|
| 1        | 0.25       | 0.005         | 320          | 1.9         | 5000 ± 500                                           | 8000 ± 800                                          | 7.8 ± 0.5                                | 12 ± 1                                  | ND                                       | ND                                      |
|          | 0.75       | 0.005         | 450          | 2.5         | 1500 ± 100                                           | 3400 ± 300                                          | 7.1 ± 0.5                                | 16 ± 1                                  | ND                                       | ND                                      |
|          | 1.25       | 0.005         | 360          | 2.2         | 1400 ± 100                                           | 2600 ± 300                                          | 5.6 ± 0.4                                | 10 ± 1                                  | ND                                       | ND                                      |
|          | 1.75       | 0.005         | 450          | 2.2         | 1400 ± 100                                           | 3080 ± 300                                          | 5.2 ± 0.4                                | 23 ± 2                                  | ND                                       | ND                                      |
|          | 2.5        | 0.01          | 470          | 2.3         | 1100 ± 100                                           | 5000 ± 500                                          | 4.7 ± 0.3                                | 22 ± 2                                  | ND                                       | ND                                      |
|          | 3.5        | 0.01          | 470          | 2.2         | 260 ± 30                                             | 1300 ± 100                                          | ND                                       | ND                                      | ND                                       | ND                                      |
|          | 4.5        | 0.01          | 530          | 2.2         | 110 ± 10                                             | 560 ± 60                                            | ND                                       | ND                                      | ND                                       | ND                                      |
|          | 5.5        | 0.01          | 540          | 2.2         | 110 ± 10                                             | 600 ± 60                                            | ND                                       | ND                                      | ND                                       | ND                                      |
|          | 6.5        | 0.01          | 530          | 2.1         | 180 ± 20                                             | 930 ± 90                                            | ND                                       | ND                                      | ND                                       | ND                                      |
|          | 7.5        | 0.01          | 560          | 2.2         | 190 ± 20                                             | 1100 ± 100                                          | ND                                       | ND                                      | ND                                       | ND                                      |
|          | 8.5        | 0.01          | 570          | 2.1         | 170 ± 20                                             | 950 ± 90                                            | ND                                       | ND                                      | ND                                       | ND                                      |
| 9.5      | 0.01       | 560           | 2.0          | 160 ± 20    | 910 ± 90                                             | ND                                                  | ND                                       | ND                                      | ND                                       |                                         |
| 2        | 0.25       | 0.005         | 420          | 2.6         | 2000 ± 200                                           | 4300 ± 400                                          | 3.8 ± 0.3                                | 8.0 ± 0.6                               | ND                                       | ND                                      |
|          | 0.75       | 0.005         | 390          | 2.1         | 1600 ± 200                                           | 3000 ± 300                                          | 4.9 ± 0.4                                | 9.5 ± 0.7                               | ND                                       | ND                                      |
|          | 1.25       | 0.005         | 390          | 2.5         | 1000 ± 100                                           | 1900 ± 200                                          | 2.4 ± 0.2                                | 4.6 ± 0.3                               | ND                                       | ND                                      |
|          | 1.75       | 0.005         | 460          | 2.2         | 480 ± 50                                             | 1100 ± 100                                          | 1.8 ± 0.2                                | 4.1 ± 0.6                               | ND                                       | ND                                      |
|          | 2.5        | 0.01          | 530          | 2.8         | 410 ± 40                                             | 2200 ± 200                                          | ND                                       | ND                                      | ND                                       | ND                                      |
|          | 3.5        | 0.01          | 520          | 2.3         | 340 ± 30                                             | 1800 ± 200                                          | ND                                       | ND                                      | ND                                       | ND                                      |
|          | 4.5        | 0.01          | 520          | 2.3         | 440 ± 40                                             | 2300 ± 200                                          | ND                                       | ND                                      | ND                                       | ND                                      |
|          | 5.5        | 0.01          | 510          | 2.2         | 320 ± 30                                             | 1600 ± 200                                          | ND                                       | ND                                      | ND                                       | ND                                      |
|          | 6.5        | 0.01          | 510          | 2.3         | 120 ± 10                                             | 640 ± 60                                            | ND                                       | ND                                      | ND                                       | ND                                      |
|          | 7.5        | 0.01          | 510          | 2.2         | 42 ± 4                                               | 210 ± 20                                            | ND                                       | ND                                      | ND                                       | ND                                      |
|          | 8.5        | 0.01          | 510          | 2.2         | 33 ± 3                                               | 170 ± 20                                            | ND                                       | ND                                      | ND                                       | ND                                      |
| 9.5      | 0.01       | 590           | 2.4          | 46 ± 5      | 270 ± 30                                             | ND                                                  | ND                                       | ND                                      | ND                                       |                                         |
| 3        | 0.25       | 0.005         | 290          | 2.3         | 900 ± 70                                             | 1300 ± 100                                          | 6.7 ± 0.7                                | 10 ± 1                                  | ND                                       | ND                                      |
|          | 0.75       | 0.005         | 290          | 2.3         | 830 ± 60                                             | 1200 ± 100                                          | 3.4 ± 0.5                                | 5.0 ± 0.8                               | ND                                       | ND                                      |
|          | 1.25       | 0.005         | 290          | 2.3         | 660 ± 50                                             | 1000 ± 100                                          | 2.7 ± 0.3                                | 4.0 ± 0.5                               | ND                                       | ND                                      |
|          | 1.75       | 0.005         | 290          | 2.3         | 520 ± 40                                             | 760 ± 60                                            | 1.5 ± 0.3                                | 2.2 ± 0.4                               | ND                                       | ND                                      |
|          | 2.5        | 0.01          | 290          | 2.3         | 170 ± 10                                             | 490 ± 40                                            | ND                                       | ND                                      | ND                                       | ND                                      |
|          | 3.5        | 0.01          | 290          | 2.3         | --                                                   | --                                                  | ND                                       | ND                                      | ND                                       | ND                                      |
|          | 4.5        | 0.01          | 290          | 2.3         | --                                                   | --                                                  | ND                                       | ND                                      | ND                                       | ND                                      |
|          | 5.5        | 0.01          | 290          | 2.3         | --                                                   | --                                                  | ND                                       | ND                                      | ND                                       | ND                                      |
| 4        | 0.25       | 0.005         | 280          | 2.8         | 960 ± 70                                             | 1300 ± 100                                          | 22 ± 2                                   | 30 ± 2                                  | 23 ± 4                                   | 32 ± 5                                  |
|          | 0.75       | 0.005         | 260          | 2.2         | 640 ± 50                                             | 830 ± 60                                            | 3.1 ± 0.9                                | 4 ± 1                                   | ND                                       | ND                                      |
|          | 1.25       | 0.005         | 310          | 1.8         | 760 ± 60                                             | 1200 ± 100                                          | 3 ± 1                                    | 5 ± 2                                   | ND                                       | ND                                      |
|          | 1.75       | 0.005         | 290          | 2.2         | 850 ± 60                                             | 1200 ± 100                                          | 3 ± 1                                    | 5 ± 1                                   | ND                                       | ND                                      |

|     |      |       |      |     |            |            |           |           |           |          |
|-----|------|-------|------|-----|------------|------------|-----------|-----------|-----------|----------|
|     | 2.5  | 0.01  | 310  | 1.7 | 950 ± 70   | 2900 ± 200 | 2.0 ± 0.3 | 6 ± 1     | ND        | ND       |
|     | 3.5  | 0.01  | 270  | 2.1 | 1000 ± 100 | 2700 ± 200 | 3.1 ± 0.4 | 9 ± 1     | ND        | ND       |
|     | 4.5  | 0.01  | 300  | 2.1 | 1000 ± 100 | 3000 ± 200 | 2.8 ± 0.4 | 8 ± 1     | ND        | ND       |
|     | 5.5  | 0.01  | 300  | 1.7 | 1000 ± 100 | 3000 ± 200 | 2.1 ± 0.4 | 6 ± 1     | ND        | ND       |
|     | 6.5  | 0.01  | 310  | 2.8 | 1000 ± 100 | 3200 ± 200 | ND        | ND        | ND        | ND       |
|     | 7.5  | 0.01  | 310  | 3.1 | 970 ± 70   | 3000 ± 200 | ND        | ND        | ND        | ND       |
| 5   | 0.25 | 0.005 | 940  | 2.4 | 610 ± 60   | 2900 ± 300 | 22 ± 2    | 100 ± 10  | 22 ± 2    | 100 ± 10 |
|     | 0.75 | 0.005 | 990  | 2.4 | 420 ± 40   | 2100 ± 200 | 5.8 ± 0.4 | 29 ± 2    | 6.3 ± 0.6 | 31 ± 3   |
|     | 1.25 | 0.005 | 890  | 2.2 | 340 ± 30   | 1500 ± 100 | 3.4 ± 0.2 | 15 ± 1    | 3.4 ± 0.3 | 15 ± 1   |
|     | 1.75 | 0.005 | 910  | 2.3 | 320 ± 30   | 1500 ± 100 | 4.3 ± 0.3 | 19 ± 1    | 3.8 ± 0.5 | 17 ± 2   |
|     | 2.5  | 0.01  | 770  | 2.0 | 250 ± 20   | 1900 ± 200 | 3.0 ± 0.2 | 23 ± 2    | 2.9 ± 0.3 | 22 ± 3   |
|     | 3.5  | 0.01  | 800  | 2.2 | 170 ± 20   | 1400 ± 200 | 1.5 ± 0.1 | 12 ± 1    | ND        | ND       |
|     | 4.5  | 0.01  | 780  | 1.8 | 110 ± 10   | 860 ± 90   | 1.0 ± 0.1 | 7.5 ± 0.9 | ND        | ND       |
|     | 5.5  | 0.01  | 780  | 1.8 | 170 ± 20   | 1300 ± 100 | 1.0 ± 0.1 | 8.0 ± 0.6 | ND        | ND       |
|     | 6.5  | 0.01  | 780  | 1.8 | 200 ± 20   | 1600 ± 200 | ND        | ND        | ND        | ND       |
|     | 7.5  | 0.01  | 780  | 1.8 | 54 ± 5     | 420 ± 40   | ND        | ND        | ND        | ND       |
|     | 8.5  | 0.01  | 780  | 1.8 | 7 ± 1      | 58 ± 6     | ND        | ND        | ND        | ND       |
| 9.5 | 0.01 | 780   | 1.8  | --  | --         | ND         | ND        | ND        | ND        |          |
| 6   | 0.25 | 0.005 | 750  | 2.5 | 640 ± 50   | 2400 ± 200 | 48 ± 3    | 180 ± 10  | 34 ± 5    | 130 ± 20 |
|     | 0.75 | 0.005 | 750  | 2.5 | 650 ± 50   | 2400 ± 200 | 11 ± 1    | 40 ± 3    | 8 ± 2     | 31 ± 6   |
|     | 1.25 | 0.005 | 750  | 2.5 | 610 ± 50   | 2300 ± 200 | 17 ± 1    | 65 ± 5    | 13 ± 2    | 51 ± 7   |
|     | 1.75 | 0.005 | 690  | 1.6 | 480 ± 40   | 1700 ± 100 | 15 ± 1    | 52 ± 4    | 12 ± 2    | 43 ± 5   |
|     | 2.5  | 0.01  | 920  | 2.6 | 360 ± 30   | 3300 ± 200 | 2.8 ± 0.2 | 25 ± 2    | 3.5 ± 0.5 | 32 ± 4   |
|     | 3.5  | 0.01  | 1140 | 2.2 | 250 ± 20   | 2900 ± 200 | 1.1 ± 0.2 | 13 ± 2    | ND        | ND       |
|     | 4.5  | 0.01  | 1140 | 2.5 | 120 ± 10   | 1400 ± 100 | ND        | ND        | ND        | ND       |
|     | 5.5  | 0.01  | 910  | 2.1 | 23 ± 3     | 210 ± 30   | ND        | ND        | ND        | ND       |
|     | 6.5  | 0.01  | 850  | 1.9 | 15 ± 3     | 130 ± 30   | ND        | ND        | ND        | ND       |
|     | 7.5  | 0.01  | 830  | 1.9 | 10 ± 7     | 80 ± 60    | ND        | ND        | ND        | ND       |
|     | 8.5  | 0.01  | 1010 | 2.1 | --         | --         | ND        | ND        | ND        | ND       |
|     | 9.5  | 0.01  | 800  | 2.3 | --         | --         | ND        | ND        | ND        | ND       |
|     | 10.5 | 0.01  | 750  | 2.5 | --         | --         | ND        | ND        | ND        | ND       |
|     | 11.5 | 0.01  | 770  | 3.1 | --         | --         | ND        | ND        | ND        | ND       |
|     | 13   | 0.02  | 780  | 2.2 | --         | --         | ND        | ND        | ND        | ND       |
| 15  | 0.02 | 680   | 1.8  | --  | --         | ND         | ND        | ND        | ND        |          |
| 17  | 0.02 | 950   | 2.5  | --  | --         | ND         | ND        | ND        | ND        |          |
| 7   | 0.25 | 0.005 | 630  | 1.0 | 190 ± 10   | 610 ± 40   | 6.3 ± 0.4 | 20 ± 1    | 6 ± 1     | 20 ± 3   |
|     | 0.75 | 0.005 | 570  | 0.9 | 140 ± 10   | 400 ± 30   | 3.3 ± 0.4 | 9 ± 1     | 4 ± 1     | 12 ± 4   |
|     | 1.25 | 0.005 | 830  | 1.1 | 150 ± 10   | 620 ± 50   | 2.4 ± 0.4 | 10 ± 1    | 2 ± 1     | 10 ± 4   |
|     | 1.75 | 0.005 | 800  | 1.5 | 170 ± 10   | 660 ± 50   | 3.0 ± 0.4 | 12 ± 1    | 3 ± 1     | 14 ± 4   |
|     | 2.5  | 0.01  | 810  | 1.3 | 170 ± 10   | 1400 ± 100 | 2.2 ± 0.2 | 18 ± 1    | ND        | ND       |

|    |      |       |      |     |          |            |           |          |           |          |
|----|------|-------|------|-----|----------|------------|-----------|----------|-----------|----------|
|    | 3.5  | 0.01  | 700  | 1.1 | 160 ± 10 | 1100 ± 80  | 2.6 ± 0.2 | 18 ± 1   | ND        | ND       |
|    | 4.5  | 0.01  | 810  | 1.3 | 140 ± 10 | 1150 ± 90  | 0.7 ± 0.1 | 5 ± 1    | ND        | ND       |
|    | 5.5  | 0.01  | 750  | 1.2 | 120 ± 10 | 920 ± 70   | 0.6 ± 0.1 | 4 ± 1    | ND        | ND       |
|    | 6.5  | 0.01  | 840  | 1.4 | 81 ± 6   | 680 ± 50   | ND        | ND       | ND        | ND       |
|    | 7.5  | 0.01  | 840  | 1.4 | 42 ± 4   | 350 ± 30   | ND        | ND       | ND        | ND       |
| 8  | 0.25 | 0.005 | 270  | 1.8 | 620 ± 40 | 830 ± 60   | 94 ± 7    | 130 ± 9  | 81 ± 6    | 109 ± 8  |
|    | 0.75 | 0.005 | 280  | 1.2 | 710 ± 50 | 990 ± 70   | 56 ± 4    | 78 ± 5   | 59 ± 4    | 83 ± 6   |
|    | 1.25 | 0.005 | 320  | 1.6 | 690 ± 50 | 1100 ± 80  | 66 ± 5    | 110 ± 7  | 70 ± 5    | 111 ± 8  |
|    | 1.75 | 0.005 | 360  | 2.0 | 640 ± 50 | 1150 ± 80  | 21 ± 1    | 38 ± 3   | 21 ± 1    | 38 ± 3   |
|    | 2.5  | 0.01  | 500  | 1.7 | 530 ± 40 | 2600 ± 200 | 39 ± 3    | 190 ± 10 | 48 ± 3    | 240 ± 20 |
|    | 3.5  | 0.01  | 580  | 1.7 | 330 ± 20 | 1900 ± 100 | 7.4 ± 0.5 | 43 ± 3   | 7.5 ± 0.7 | 43 ± 4   |
|    | 4.5  | 0.01  | 660  | 1.6 | 280 ± 20 | 1800 ± 100 | 4.0 ± 0.3 | 26 ± 2   | ND        | ND       |
|    | 5.5  | 0.01  | 630  | 1.4 | 290 ± 20 | 1800 ± 100 | 9.6 ± 0.7 | 61 ± 4   | 10 ± 1    | 66 ± 5   |
|    | 6.5  | 0.01  | 620  | 1.6 | 300 ± 20 | 1900 ± 100 | 13 ± 1    | 78 ± 5   | 13 ± 1    | 78 ± 6   |
|    | 7.5  | 0.01  | 620  | 1.6 | 310 ± 20 | 1900 ± 100 | 16 ± 1    | 97 ± 7   | 16 ± 1    | 100 ± 7  |
| 9  | 0.25 | 0.005 | 440  | 0.8 | 470 ± 30 | 1030 ± 70  | 57 ± 4    | 124 ± 9  | 63 ± 4    | 140 ± 10 |
|    | 0.75 | 0.005 | 360  | 0.7 | 390 ± 30 | 690 ± 50   | 43 ± 3    | 78 ± 5   | 45 ± 4    | 80 ± 7   |
|    | 1.25 | 0.005 | 460  | 1.0 | 340 ± 20 | 790 ± 60   | 32 ± 2    | 74 ± 5   | 35 ± 3    | 81 ± 7   |
|    | 1.75 | 0.005 | 670  | 1.9 | 310 ± 20 | 1040 ± 80  | 19 ± 2    | 62 ± 6   | 20 ± 5    | 70 ± 20  |
|    | 2.5  | 0.01  | 770  | 1.5 | 300 ± 20 | 2300 ± 200 | 11 ± 1    | 87 ± 6   | 14 ± 1    | 106 ± 9  |
|    | 3.5  | 0.01  | 760  | 1.6 | 270 ± 20 | 2100 ± 100 | 8.7 ± 0.6 | 66 ± 5   | 9 ± 2     | 70 ± 10  |
|    | 4.5  | 0.01  | 710  | 1.4 | 240 ± 20 | 1700 ± 100 | 2.6 ± 0.4 | 19 ± 3   | ND        | ND       |
|    | 5.5  | 0.01  | 890  | 1.6 | 200 ± 10 | 1800 ± 100 | 1.5 ± 0.4 | 13 ± 3   | ND        | ND       |
|    | 6.5  | 0.01  | 865  | 1.5 | 130 ± 10 | 1120 ± 80  | 0.9 ± 0.3 | 8 ± 3    | ND        | ND       |
|    | 7.5  | 0.01  | 840  | 1.3 | 100 ± 10 | 840 ± 60   | 0.6 ± 0.3 | 5 ± 2    | ND        | ND       |
| 10 | 0.25 | 0.005 | 540  | 1.1 | 320 ± 20 | 850 ± 60   | 61 ± 4    | 160 ± 10 | 71 ± 5    | 190 ± 10 |
|    | 0.75 | 0.005 | 550  | 1.1 | 320 ± 20 | 880 ± 60   | 55 ± 4    | 150 ± 10 | 59 ± 4    | 160 ± 10 |
|    | 1.25 | 0.005 | 570  | 1.2 | 320 ± 20 | 920 ± 70   | 70 ± 5    | 200 ± 10 | 82 ± 6    | 230 ± 20 |
|    | 1.75 | 0.005 | 520  | 1.1 | 290 ± 20 | 770 ± 60   | 38 ± 3    | 98 ± 7   | 42 ± 3    | 110 ± 8  |
|    | 2.5  | 0.01  | 790  | 2.1 | 260 ± 20 | 2000 ± 100 | 18 ± 1    | 140 ± 10 | 18 ± 1    | 140 ± 10 |
|    | 3.5  | 0.01  | 770  | 1.6 | 270 ± 20 | 2100 ± 200 | 5.1 ± 0.4 | 39 ± 3   | ND        | ND       |
|    | 4.5  | 0.01  | 825  | 1.7 | 250 ± 20 | 2000 ± 100 | 2.1 ± 0.3 | 17 ± 2   | ND        | ND       |
|    | 5.5  | 0.01  | 880  | 1.7 | 220 ± 20 | 1900 ± 100 | 1.6 ± 0.1 | 14 ± 1   | ND        | ND       |
|    | 6.5  | 0.01  | 800  | 1.4 | 200 ± 10 | 1600 ± 100 | 1.2 ± 0.2 | 10 ± 2   | ND        | ND       |
|    | 7.5  | 0.01  | 760  | 1.1 | 200 ± 10 | 1500 ± 100 | 0.9 ± 0.2 | 7 ± 1    | ND        | ND       |
| 11 | 0.25 | 0.005 | 1330 | 3.0 | 190 ± 10 | 1260 ± 90  | 39 ± 3    | 260 ± 20 | 41 ± 4    | 270 ± 30 |
|    | 0.75 | 0.005 | 1330 | 3.0 | 190 ± 10 | 1240 ± 90  | 45 ± 3    | 300 ± 20 | 45 ± 4    | 300 ± 20 |
|    | 1.25 | 0.005 | 1330 | 3.0 | 170 ± 10 | 1150 ± 80  | 52 ± 4    | 350 ± 20 | 61 ± 4    | 400 ± 30 |
|    | 1.75 | 0.005 | 1330 | 2.8 | 140 ± 10 | 950 ± 70   | 70 ± 5    | 470 ± 30 | 72 ± 5    | 480 ± 30 |
|    | 2.5  | 0.01  | 1180 | 2.1 | 130 ± 10 | 1500 ± 100 | 52 ± 4    | 620 ± 40 | 63 ± 4    | 740 ± 50 |



|     |      |       |      |          |            |            |           |            |          |            |
|-----|------|-------|------|----------|------------|------------|-----------|------------|----------|------------|
|     | 3.5  | 0.01  | 1300 | 2.2      | 120 ± 10   | 1500 ± 100 | 41 ± 3    | 530 ± 40   | 46 ± 3   | 600 ± 40   |
|     | 4.5  | 0.01  | 1280 | 2.1      | 100 ± 10   | 1300 ± 100 | 15 ± 1    | 200 ± 10   | 18 ± 2   | 240 ± 30   |
|     | 5.5  | 0.01  | 1150 | 1.7      | 63 ± 6     | 720 ± 70   | 6.2 ± 0.6 | 71 ± 7     | 7 ± 2    | 80 ± 20    |
|     | 6.5  | 0.01  | 1030 | 1.6      | 42 ± 3     | 430 ± 30   | 3.2 ± 0.3 | 33 ± 3     | 4 ± 1    | 40 ± 10    |
|     | 7.5  | 0.01  | 1200 | 2.1      | 33 ± 5     | 390 ± 60   | 1.5 ± 0.4 | 18 ± 5     | ND       | ND         |
|     | 8.5  | 0.01  | 1340 | 2.4      | 33 ± 5     | 440 ± 70   | 1.0 ± 0.3 | 13 ± 4     | ND       | ND         |
|     | 9.5  | 0.01  | 1290 | 2.1      | 17 ± 5     | 220 ± 70   | 0.9 ± 0.4 | 12 ± 5     | ND       | ND         |
|     | 10.5 | 0.01  | 1290 | 2.1      | 22 ± 6     | 280 ± 70   | 0.8 ± 0.3 | 10 ± 4     | ND       | ND         |
|     | 11.5 | 0.01  | 1330 | 2.0      | 16 ± 8     | 200 ± 100  | ND        | ND         | ND       | ND         |
|     | 13   | 0.02  | 1330 | 2.0      | 10 ± 6     | 300 ± 200  | 0.9 ± 0.4 | 23 ± 11    | ND       | ND         |
|     | 15   | 0.02  | 1390 | 2.3      | 7 ± 3      | 190 ± 70   | 0.6 ± 0.2 | 16 ± 4     | ND       | ND         |
|     | 16.5 | 0.01  | 1390 | 2.3      | 11 ± 5     | 150 ± 70   | ND        | ND         | ND       | ND         |
| 12  | 0.25 | 0.005 | 160  | 0.2      | 390 ± 40   | 310 ± 40   | 170 ± 10  | 135 ± 9    | 140 ± 20 | 110 ± 20   |
|     | 0.75 | 0.005 | 160  | 0.2      | 350 ± 30   | 280 ± 20   | 280 ± 20  | 230 ± 20   | 320 ± 20 | 250 ± 20   |
|     | 1.25 | 0.005 | 160  | 0.2      | 310 ± 20   | 250 ± 20   | 240 ± 20  | 190 ± 10   | 250 ± 20 | 200 ± 10   |
|     | 1.75 | 0.005 | 180  | 0.3      | 310 ± 20   | 280 ± 20   | 180 ± 10  | 160 ± 10   | 200 ± 10 | 180 ± 10   |
|     | 2.5  | 0.01  | 200  | 0.3      | 230 ± 20   | 450 ± 30   | 180 ± 10  | 360 ± 30   | 210 ± 20 | 430 ± 30   |
|     | 3.5  | 0.01  | 390  | 0.8      | 200 ± 10   | 790 ± 60   | 114 ± 8   | 440 ± 30   | 140 ± 10 | 540 ± 40   |
|     | 4.5  | 0.01  | 310  | 0.5      | 230 ± 20   | 720 ± 50   | 140 ± 10  | 430 ± 30   | 160 ± 10 | 480 ± 30   |
|     | 5.5  | 0.01  | 320  | 0.5      | 230 ± 20   | 730 ± 50   | 101 ± 7   | 320 ± 20   | 122 ± 9  | 390 ± 30   |
|     | 6.5  | 0.01  | 580  | 1.7      | 240 ± 20   | 1400 ± 100 | 102 ± 7   | 590 ± 40   | 119 ± 8  | 690 ± 50   |
|     | 7.5  | 0.01  | 320  | 0.5      | 240 ± 20   | 760 ± 60   | 52 ± 4    | 170 ± 10   | 70 ± 8   | 220 ± 30   |
|     | 8.5  | 0.01  | 600  | 2.1      | 220 ± 20   | 1300 ± 100 | 35 ± 2    | 210 ± 10   | 45 ± 5   | 270 ± 30   |
|     | 9.5  | 0.01  | 680  | 2.7      | 220 ± 20   | 1500 ± 100 | 23 ± 2    | 160 ± 10   | 26 ± 4   | 170 ± 30   |
|     | 10.5 | 0.01  | 770  | 2.2      | 210 ± 20   | 1600 ± 100 | 12 ± 1    | 91 ± 8     | 12 ± 3   | 90 ± 30    |
|     | 11.5 | 0.01  | 700  | 2.0      | 160 ± 10   | 1140 ± 90  | 10 ± 1    | 71 ± 8     | 10 ± 4   | 70 ± 30    |
| 13  | 0.02 | 900   | 2.3  | 150 ± 10 | 2700 ± 200 | 4.1 ± 0.7  | 70 ± 10   | 6 ± 3      | 110 ± 50 |            |
| 15  | 0.02 | 820   | 2.3  | 150 ± 10 | 2500 ± 200 | 4.8 ± 0.8  | 80 ± 10   | 5 ± 3      | 70 ± 40  |            |
| 17  | 0.02 | 760   | 1.9  | 88 ± 8   | 1300 ± 100 | 5.7 ± 0.8  | 90 ± 10   | 6 ± 3      | 100 ± 40 |            |
| 19  | 0.02 | 760   | 1.9  | 73 ± 7   | 1100 ± 100 | 2.1 ± 0.6  | 32 ± 9    | ND         | ND       |            |
| 13  | 0.25 | 0.005 | 790  | 2.4      | 220 ± 20   | 850 ± 60   | 86 ± 6    | 340 ± 20   | 94 ± 7   | 370 ± 30   |
|     | 0.75 | 0.005 | 790  | 2.4      | 160 ± 10   | 650 ± 50   | 99 ± 7    | 390 ± 30   | 97 ± 7   | 380 ± 30   |
|     | 1.25 | 0.005 | 770  | 1.9      | 150 ± 10   | 590 ± 40   | 160 ± 10  | 600 ± 40   | 150 ± 10 | 590 ± 40   |
|     | 1.75 | 0.005 | 950  | 2.0      | 160 ± 10   | 750 ± 60   | 210 ± 10  | 980 ± 70   | 190 ± 10 | 910 ± 60   |
|     | 2.5  | 0.01  | 830  | 2.5      | 140 ± 10   | 1200 ± 90  | 220 ± 20  | 1800 ± 100 | 230 ± 20 | 1900 ± 100 |
|     | 3.5  | 0.01  | 750  | 1.8      | 140 ± 10   | 1070 ± 80  | 250 ± 20  | 1900 ± 100 | 270 ± 20 | 2000 ± 100 |
|     | 4.5  | 0.01  | 870  | 2.1      | 150 ± 10   | 1300 ± 100 | 230 ± 20  | 2000 ± 100 | 340 ± 20 | 2900 ± 200 |
|     | 5.5  | 0.01  | 850  | 2.0      | 150 ± 10   | 1300 ± 100 | 170 ± 10  | 1400 ± 100 | 180 ± 10 | 1500 ± 100 |
|     | 6.5  | 0.01  | 1000 | 2.8      | 150 ± 10   | 1500 ± 100 | 115 ± 8   | 1150 ± 80  | 106 ± 7  | 1060 ± 70  |
| 7.5 | 0.01 | 930   | 2.4  | 150 ± 10 | 1400 ± 100 | 77 ± 5     | 720 ± 50  | 72 ± 5     | 670 ± 50 |            |

|    |      |       |      |     |          |            |           |            |          |            |
|----|------|-------|------|-----|----------|------------|-----------|------------|----------|------------|
|    | 8.5  | 0.01  | 990  | 2.8 | 150 ± 10 | 1500 ± 100 | 43 ± 3    | 420 ± 30   | 41 ± 3   | 410 ± 30   |
|    | 9.5  | 0.01  | 950  | 2.9 | 150 ± 10 | 1400 ± 100 | 22 ± 2    | 210 ± 10   | 25 ± 2   | 230 ± 20   |
|    | 10.5 | 0.01  | 880  | 2.4 | 100 ± 10 | 900 ± 70   | 13 ± 1    | 117 ± 8    | 14 ± 1   | 130 ± 10   |
|    | 11.5 | 0.01  | 900  | 2.3 | 77 ± 6   | 690 ± 60   | 17 ± 1    | 150 ± 10   | 17 ± 2   | 160 ± 20   |
|    | 13   | 0.02  | 800  | 1.8 | 140 ± 10 | 2200 ± 200 | 10 ± 1    | 160 ± 10   | 8 ± 2    | 140 ± 30   |
|    | 15   | 0.02  | 940  | 2.8 | 92 ± 7   | 1700 ± 100 | 2.5 ± 0.4 | 47 ± 7     | 4 ± 1    | 70 ± 20    |
|    | 17   | 0.02  | 900  | 2.6 | 25 ± 4   | 460 ± 80   | 6.3 ± 0.5 | 114 ± 8    | 7 ± 1    | 130 ± 20   |
|    | 18.5 | 0.01  | 920  | 2.2 | 30 ± 4   | 280 ± 30   | 3.6 ± 0.4 | 33 ± 4     | 5 ± 2    | 50 ± 10    |
|    | 0.25 | 0.005 | 950  | 2.2 | 150 ± 20 | 700 ± 70   | 270 ± 20  | 1270 ± 90  | 280 ± 20 | 1300 ± 90  |
|    | 0.75 | 0.005 | 950  | 2.2 | 130 ± 10 | 600 ± 50   | 180 ± 10  | 870 ± 60   | 210 ± 10 | 1000 ± 70  |
|    | 1.25 | 0.005 | 950  | 2.2 | 100 ± 10 | 480 ± 40   | 140 ± 10  | 690 ± 50   | 170 ± 10 | 810 ± 60   |
|    | 1.75 | 0.005 | 950  | 2.2 | 110 ± 10 | 510 ± 40   | 140 ± 10  | 680 ± 50   | 160 ± 10 | 780 ± 50   |
|    | 2.5  | 0.01  | 1020 | 2.1 | 130 ± 10 | 1300 ± 100 | 220 ± 20  | 2200 ± 200 | 270 ± 20 | 2700 ± 200 |
|    | 3.5  | 0.01  | 990  | 2.2 | 120 ± 10 | 1200 ± 100 | 520 ± 40  | 5200 ± 400 | 710 ± 50 | 7000 ± 500 |
|    | 4.5  | 0.01  | 1000 | 2.1 | 120 ± 10 | 1200 ± 100 | 270 ± 20  | 2700 ± 200 | 320 ± 20 | 3200 ± 200 |
|    | 5.5  | 0.01  | 980  | 2.0 | 120 ± 10 | 1200 ± 100 | 230 ± 20  | 2200 ± 200 | 260 ± 20 | 2600 ± 200 |
| 14 | 6.5  | 0.01  | 1000 | 2.0 | 120 ± 10 | 1200 ± 100 | 260 ± 20  | 2600 ± 200 | 310 ± 20 | 3100 ± 200 |
|    | 7.5  | 0.01  | 980  | 2.2 | 150 ± 20 | 1400 ± 200 | 280 ± 20  | 2700 ± 200 | 330 ± 20 | 3300 ± 200 |
|    | 8.5  | 0.01  | 1070 | 2.1 | 100 ± 10 | 1020 ± 80  | 160 ± 10  | 1700 ± 100 | 180 ± 10 | 1900 ± 100 |
|    | 9.5  | 0.01  | 980  | 2.2 | 89 ± 8   | 870 ± 80   | 160 ± 10  | 1500 ± 100 | 190 ± 10 | 1800 ± 100 |
|    | 10.5 | 0.01  | 1170 | 2.5 | 110 ± 10 | 1300 ± 100 | 150 ± 10  | 1700 ± 100 | 180 ± 10 | 2100 ± 100 |
|    | 11.5 | 0.01  | 950  | 1.6 | 100 ± 10 | 920 ± 80   | 200 ± 10  | 1900 ± 100 | 250 ± 20 | 2400 ± 200 |
|    | 13   | 0.02  | 980  | 1.7 | 82 ± 7   | 1600 ± 100 | 28 ± 2    | 560 ± 40   | 36 ± 3   | 700 ± 70   |
|    | 15   | 0.02  | 1090 | 2.0 | 82 ± 8   | 1800 ± 200 | 79 ± 6    | 1700 ± 100 | 89 ± 6   | 1900 ± 100 |
|    | 0    | 0     | 0    |     | 110 ± 20 |            | 51 ± 4    |            | 60 ± 10  |            |
|    | 0.5  | 0.01  | 1220 | 1.4 | 25 ± 3   | 310 ± 30   | 10 ± 1    | 121 ± 8    | 12 ± 1   | 150 ± 10   |
|    | 1.5  | 0.01  | 1220 | 1.4 | 29 ± 5   | 350 ± 60   | 18 ± 1    | 220 ± 20   | 20 ± 2   | 250 ± 30   |
|    | 2.5  | 0.01  | 1050 | 1.4 | 24 ± 5   | 260 ± 50   | 15 ± 1    | 160 ± 10   | 17 ± 2   | 180 ± 20   |
|    | 3.5  | 0.01  | 1090 | 1.2 | 30 ± 5   | 330 ± 50   | 10 ± 1    | 108 ± 8    | 10 ± 2   | 110 ± 20   |
|    | 4.5  | 0.01  | 1020 | 1.2 | 27 ± 8   | 280 ± 80   | 13 ± 1    | 140 ± 10   | 14 ± 2   | 140 ± 20   |
| 15 | 5.5  | 0.01  | 1050 | 1.3 | 22 ± 5   | 230 ± 50   | 11 ± 1    | 118 ± 8    | 12 ± 2   | 130 ± 20   |
|    | 6.5  | 0.01  | 950  | 1.1 | 33 ± 5   | 310 ± 50   | 13 ± 1    | 123 ± 9    | 15 ± 2   | 140 ± 20   |
|    | 7.5  | 0.01  | 960  | 1.2 | 48 ± 6   | 460 ± 60   | 14 ± 1    | 140 ± 10   | 15 ± 3   | 140 ± 20   |
|    | 8.5  | 0.01  | 1120 | 1.4 | 32 ± 5   | 360 ± 60   | 16 ± 1    | 180 ± 10   | 19 ± 3   | 210 ± 30   |
|    | 9.5  | 0.01  | 940  | 1.1 | 22 ± 6   | 210 ± 50   | 15 ± 1    | 140 ± 10   | 19 ± 2   | 180 ± 20   |
|    | 11   | 0.02  | 1100 | 1.5 | 32 ± 5   | 700 ± 100  | 8.9 ± 0.6 | 200 ± 10   | 10 ± 2   | 210 ± 50   |
|    | 0.25 | 0.005 | 1210 | 1.5 | 36 ± 4   | 220 ± 20   | 25 ± 2    | 150 ± 10   | 26 ± 2   | 160 ± 10   |
| 16 | 0.75 | 0.005 | 1080 | 1.2 | 27 ± 2   | 150 ± 10   | 15 ± 1    | 83 ± 6     | 16 ± 1   | 85 ± 6     |
|    | 1.25 | 0.005 | 1220 | 1.5 | 25 ± 2   | 150 ± 10   | 14 ± 1    | 88 ± 6     | 14 ± 1   | 88 ± 6     |
|    | 1.75 | 0.005 | 1060 | 1.3 | 27 ± 2   | 140 ± 10   | 15 ± 1    | 82 ± 6     | 17 ± 1   | 92 ± 6     |

|    |      |       |      |     |        |           |           |           |        |           |
|----|------|-------|------|-----|--------|-----------|-----------|-----------|--------|-----------|
|    | 2.5  | 0.01  | 1140 | 1.5 | 30 ± 3 | 340 ± 30  | 18 ± 1    | 200 ± 10  | 20 ± 1 | 230 ± 20  |
|    | 3.5  | 0.01  | 1260 | 1.7 | 25 ± 2 | 320 ± 30  | 18 ± 1    | 220 ± 20  | 19 ± 1 | 230 ± 20  |
|    | 4.5  | 0.01  | 1010 | 1.2 | 27 ± 4 | 270 ± 40  | 21 ± 1    | 210 ± 10  | 21 ± 2 | 210 ± 20  |
|    | 5.5  | 0.01  | 1170 | 1.6 | 33 ± 4 | 390 ± 50  | 26 ± 2    | 300 ± 20  | 22 ± 2 | 260 ± 20  |
|    | 6.5  | 0.01  | 1350 | 2.0 | 35 ± 6 | 470 ± 80  | 20 ± 1    | 280 ± 20  | 22 ± 2 | 300 ± 20  |
|    | 7.5  | 0.01  | 1190 | 1.7 | 28 ± 7 | 340 ± 80  | 21 ± 1    | 250 ± 20  | 21 ± 2 | 260 ± 30  |
|    | 8.5  | 0.01  | 1140 | 1.5 | 28 ± 5 | 320 ± 60  | 21 ± 1    | 240 ± 20  | 21 ± 1 | 240 ± 20  |
|    | 9.5  | 0.01  | 1100 | 1.4 | 28 ± 4 | 300 ± 50  | 21 ± 1    | 230 ± 20  | 16 ± 1 | 180 ± 20  |
|    | 11   | 0.02  | 1100 | 1.4 | 23 ± 3 | 510 ± 70  | 17 ± 1    | 370 ± 30  | 16 ± 1 | 360 ± 30  |
|    | 13   | 0.02  | 1100 | 1.4 | 31 ± 4 | 680 ± 90  | 8.5 ± 0.6 | 190 ± 10  | 9 ± 1  | 190 ± 20  |
|    | 0.25 | 0.005 | 1020 | 1.4 | 27 ± 8 | 140 ± 40  | 40 ± 3    | 200 ± 10  | 42 ± 4 | 210 ± 20  |
|    | 0.75 | 0.005 | 1140 | 2.4 | 44 ± 7 | 250 ± 40  | 29 ± 2    | 170 ± 10  | 33 ± 3 | 190 ± 20  |
|    | 1.25 | 0.005 | 1040 | 1.4 | 48 ± 6 | 250 ± 30  | 44 ± 3    | 230 ± 20  | 51 ± 4 | 260 ± 20  |
|    | 1.75 | 0.005 | 1110 | 1.5 | 32 ± 5 | 180 ± 30  | 20 ± 1    | 109 ± 8   | 21 ± 2 | 120 ± 10  |
|    | 2.5  | 0.01  | 1280 | 1.9 | 30 ± 5 | 390 ± 60  | 25 ± 2    | 320 ± 20  | 29 ± 2 | 370 ± 30  |
|    | 3.5  | 0.01  | 1090 | 1.7 | 39 ± 6 | 430 ± 60  | 35 ± 2    | 380 ± 30  | 44 ± 3 | 480 ± 30  |
|    | 4.5  | 0.01  | 990  | 1.4 | 58 ± 7 | 570 ± 60  | 85 ± 6    | 840 ± 60  | 93 ± 7 | 920 ± 60  |
| 17 | 5.5  | 0.01  | 1240 | 2.1 | 27 ± 5 | 340 ± 60  | 32 ± 2    | 400 ± 30  | 38 ± 3 | 470 ± 30  |
|    | 6.5  | 0.01  | 1120 | 1.6 | 48 ± 4 | 540 ± 50  | 62 ± 4    | 700 ± 50  | 73 ± 5 | 820 ± 60  |
|    | 7.5  | 0.01  | 1250 | 1.8 | 48 ± 6 | 610 ± 70  | 45 ± 3    | 570 ± 40  | 54 ± 4 | 670 ± 50  |
|    | 8.5  | 0.01  | 1370 | 2.1 | 29 ± 5 | 390 ± 70  | 20 ± 1    | 270 ± 20  | 24 ± 3 | 320 ± 40  |
|    | 9.5  | 0.01  | 1290 | 1.9 | 45 ± 5 | 580 ± 70  | 38 ± 3    | 490 ± 30  | 43 ± 3 | 550 ± 40  |
|    | 10.5 | 0.01  | 1290 | 1.9 | 38 ± 6 | 490 ± 70  | 40 ± 3    | 520 ± 40  | 52 ± 4 | 670 ± 50  |
|    | 11.5 | 0.01  | 1290 | 1.9 | 33 ± 5 | 430 ± 70  | 17 ± 1    | 220 ± 20  | 24 ± 3 | 310 ± 30  |
|    | 12.5 | 0.01  | 1290 | 1.9 | 43 ± 7 | 550 ± 80  | 18 ± 1    | 230 ± 20  | 21 ± 2 | 270 ± 30  |
|    | 13.5 | 0.01  | 1290 | 1.9 | 37 ± 5 | 470 ± 60  | 13 ± 1    | 170 ± 10  | 16 ± 2 | 210 ± 30  |
|    | 0.25 | 0.005 | 1010 | 1.5 | 37 ± 3 | 190 ± 20  | 73 ± 5    | 370 ± 30  | 73 ± 5 | 370 ± 30  |
|    | 0.75 | 0.005 | 1090 | 1.6 | 23 ± 2 | 120 ± 10  | 51 ± 4    | 280 ± 20  | 54 ± 4 | 290 ± 20  |
|    | 1.25 | 0.005 | 1080 | 1.5 | 21 ± 2 | 120 ± 10  | 43 ± 3    | 230 ± 20  | 46 ± 3 | 250 ± 20  |
|    | 1.75 | 0.005 | 1130 | 1.7 | 19 ± 3 | 110 ± 20  | 42 ± 3    | 240 ± 20  | 44 ± 3 | 250 ± 20  |
|    | 2.5  | 0.01  | 1140 | 1.6 | 13 ± 3 | 140 ± 30  | 38 ± 3    | 440 ± 30  | 42 ± 3 | 480 ± 30  |
|    | 3.5  | 0.01  | 1170 | 1.7 | 13 ± 2 | 150 ± 20  | 37 ± 3    | 430 ± 30  | 38 ± 3 | 440 ± 30  |
|    | 4.5  | 0.01  | 1050 | 1.4 | 11 ± 3 | 120 ± 30  | 25 ± 2    | 260 ± 20  | 27 ± 2 | 290 ± 20  |
| 18 | 5.5  | 0.01  | 1120 | 1.6 | 17 ± 6 | 190 ± 60  | 29 ± 2    | 320 ± 20  | 31 ± 2 | 350 ± 20  |
|    | 6.5  | 0.01  | 1120 | 1.6 | 15 ± 6 | 170 ± 70  | 39 ± 3    | 440 ± 30  | 39 ± 3 | 440 ± 30  |
|    | 7.5  | 0.01  | 1060 | 1.5 | 17 ± 6 | 180 ± 60  | 35 ± 2    | 380 ± 30  | 36 ± 3 | 380 ± 30  |
|    | 8.5  | 0.01  | 1130 | 1.6 | 18 ± 6 | 210 ± 70  | 38 ± 3    | 430 ± 30  | 37 ± 3 | 420 ± 30  |
|    | 9.5  | 0.01  | 1250 | 1.9 | 15 ± 4 | 180 ± 50  | 41 ± 3    | 520 ± 40  | 42 ± 3 | 520 ± 40  |
|    | 11   | 0.02  | 1250 | 1.9 | 18 ± 4 | 460 ± 100 | 42 ± 3    | 1050 ± 70 | 47 ± 3 | 1170 ± 80 |
|    | 13   | 0.02  | 1250 | 1.9 | 15 ± 3 | 380 ± 70  | 45 ± 3    | 1120 ± 80 | 44 ± 3 | 1110 ± 80 |

|    |      |      |      |        |          |           |             |              |              |              |
|----|------|------|------|--------|----------|-----------|-------------|--------------|--------------|--------------|
| 19 | 0.5  | 0.01 | 1480 | 2.2    | 15 ± 4   | 230 ± 60  | 25 ± 2      | 370 ± 30     | 30 ± 2       | 440 ± 30     |
|    | 1.5  | 0.01 | 1520 | 2.3    | 10 ± 4   | 150 ± 70  | 21 ± 1      | 320 ± 20     | 22 ± 2       | 330 ± 30     |
|    | 2.5  | 0.01 | 1370 | 2.0    | 19 ± 4   | 260 ± 60  | 47 ± 3      | 650 ± 50     | 51 ± 4       | 700 ± 50     |
|    | 3.5  | 0.01 | 1320 | 1.9    | 11 ± 3   | 150 ± 40  | 47 ± 3      | 620 ± 40     | 52 ± 4       | 680 ± 50     |
|    | 4.5  | 0.01 | 1330 | 1.9    | 13 ± 1   | 170 ± 20  | 24 ± 2      | 320 ± 20     | 26 ± 2       | 340 ± 20     |
|    | 5.5  | 0.01 | 1380 | 2.0    | 10 ± 2   | 140 ± 20  | 27 ± 2      | 370 ± 30     | 28 ± 2       | 390 ± 30     |
|    | 6.5  | 0.01 | 1390 | 2.0    | 14 ± 2   | 200 ± 30  | 21 ± 2      | 300 ± 20     | 23 ± 2       | 320 ± 20     |
|    | 7.5  | 0.01 | 1300 | 1.8    | 9 ± 4    | 120 ± 50  | 19 ± 1      | 250 ± 20     | 19 ± 2       | 250 ± 20     |
|    | 8.5  | 0.01 | 1360 | 1.9    | 13 ± 4   | 180 ± 50  | 24 ± 2      | 330 ± 20     | 24 ± 2       | 330 ± 20     |
|    | 9.5  | 0.01 | 1250 | 1.7    | 15 ± 4   | 190 ± 50  | 25 ± 2      | 310 ± 20     | 24 ± 2       | 300 ± 20     |
|    | 11   | 0.02 | 1410 | 2.1    | 13 ± 3   | 380 ± 80  | 27 ± 2      | 760 ± 50     | 27 ± 2       | 760 ± 50     |
|    | 13   | 0.02 | 1310 | 1.8    | 17 ± 5   | 400 ± 100 | 19 ± 1      | 490 ± 30     | 19 ± 1       | 490 ± 40     |
|    | 15   | 0.02 | 1370 | 2.0    | 13 ± 5   | 400 ± 100 | 19 ± 1      | 520 ± 40     | 23 ± 2       | 630 ± 50     |
| 20 | 0.5  | 0.01 | 1200 | 2.1    | 3 ± 6    | 40 ± 70   | 1600 ± 100  | 19000 ± 1000 | 1320 ± 90    | 16000 ± 1000 |
|    | 1.5  | 0.01 | 1220 | 2.0    | 14 ± 4   | 170 ± 50  | 128 ± 9     | 1600 ± 100   | 150 ± 10     | 1800 ± 100   |
|    | 2.5  | 0.01 | 1130 | 1.9    | 20 ± 4   | 230 ± 50  | 170 ± 10    | 1900 ± 100   | 180 ± 10     | 2100 ± 100   |
|    | 3.5  | 0.01 | 1290 | 2.3    | 19 ± 4   | 240 ± 50  | 180 ± 10    | 2300 ± 200   | 200 ± 10     | 2600 ± 200   |
|    | 4.5  | 0.01 | 1110 | 1.7    | 15 ± 4   | 170 ± 50  | 220 ± 20    | 2400 ± 200   | 230 ± 20     | 2500 ± 200   |
|    | 5.5  | 0.01 | 1030 | 1.7    | 36 ± 5   | 370 ± 50  | 230 ± 20    | 2400 ± 200   | 250 ± 20     | 2600 ± 200   |
|    | 6.5  | 0.01 | 1130 | 1.8    | 18 ± 4   | 210 ± 40  | 220 ± 20    | 2500 ± 200   | 240 ± 20     | 2700 ± 200   |
|    | 7.5  | 0.01 | 1100 | 1.7    | 18 ± 3   | 190 ± 40  | 220 ± 20    | 2400 ± 200   | 240 ± 20     | 2600 ± 200   |
|    | 8.5  | 0.01 | 1220 | 2.1    | 18 ± 3   | 230 ± 40  | 230 ± 20    | 2900 ± 200   | 290 ± 20     | 3600 ± 200   |
|    | 9.5  | 0.01 | 1050 | 1.6    | 19 ± 4   | 200 ± 40  | 210 ± 10    | 2200 ± 200   | 250 ± 20     | 2700 ± 200   |
|    | 11   | 0.02 | 1120 | 1.8    | 6 ± 5    | 100 ± 100 | 330 ± 20    | 7400 ± 500   | 350 ± 20     | 7800 ± 500   |
|    | 13   | 0.02 | 1200 | 1.9    | 14 ± 3   | 350 ± 80  | 220 ± 20    | 5300 ± 400   | 240 ± 20     | 5800 ± 400   |
|    | 15   | 0.02 | 1190 | 2.0    | 9 ± 3    | 220 ± 70  | 280 ± 20    | 6800 ± 500   | 300 ± 20     | 7200 ± 500   |
| 17 | 0.02 | 970  | 1.8  | 44 ± 4 | 860 ± 80 | 690 ± 50  | 13300 ± 900 | 720 ± 50     | 14000 ± 1000 |              |

Depth values signify the average depth of the section below the sediment surface (e.g. a 0 to 1 cm section will have a depth of 0.5 cm). Thickness is the vertical width of the sections. Activities are reported as Bq kg<sup>-1</sup> dry. Bulk density is reported as dry kg per total volume in m<sup>3</sup>. Dry density is reported as gram dry per volume of dry sample in cm<sup>3</sup>.

ND Not detectable

-- Sections reached equilibrium for <sup>210</sup>Pb<sub>ex</sub> (<sup>214</sup>Pb values within uncertainty of <sup>210</sup>Pb for same section)

<sup>1</sup>Values were decay-corrected to FDNPP discharge maximum (April 6<sup>th</sup>, 2011)
